# Supplementary material for: Prolonged Subculturing of Aspergillus fumigatus on Galleria Extract Agar Results in Altered Virulence and Sensitivity to Antifungal Agents
Source: MDPI journal article supplement (doi:10.3390/cells12071065), 2023-03-31
Supplement: s1 [file s1]

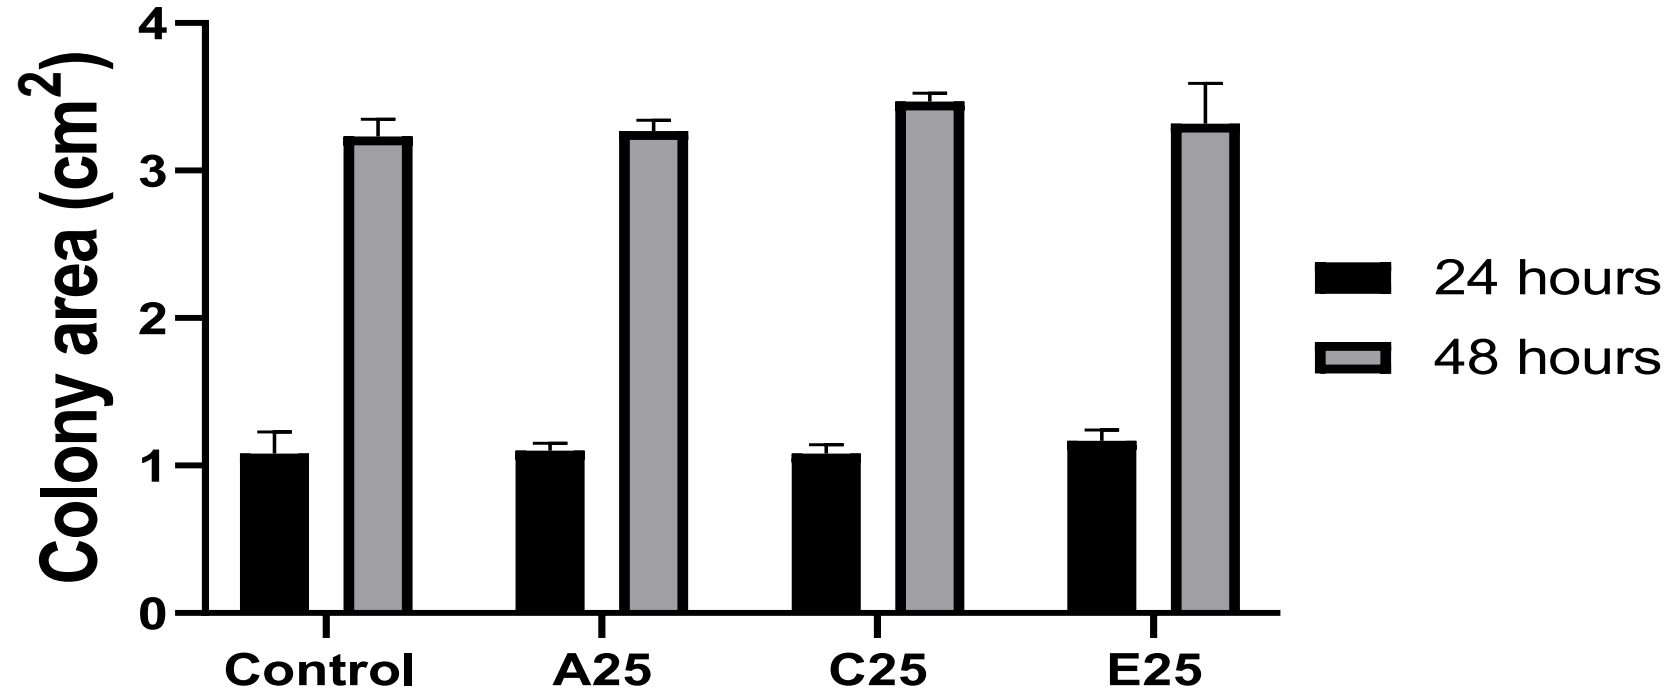

**Figure S1.** Colony area of passaged and control *A. fumigatus* on Malt extract agar over 48 hours. No significant alteration was observed in the growth rate of the strains.

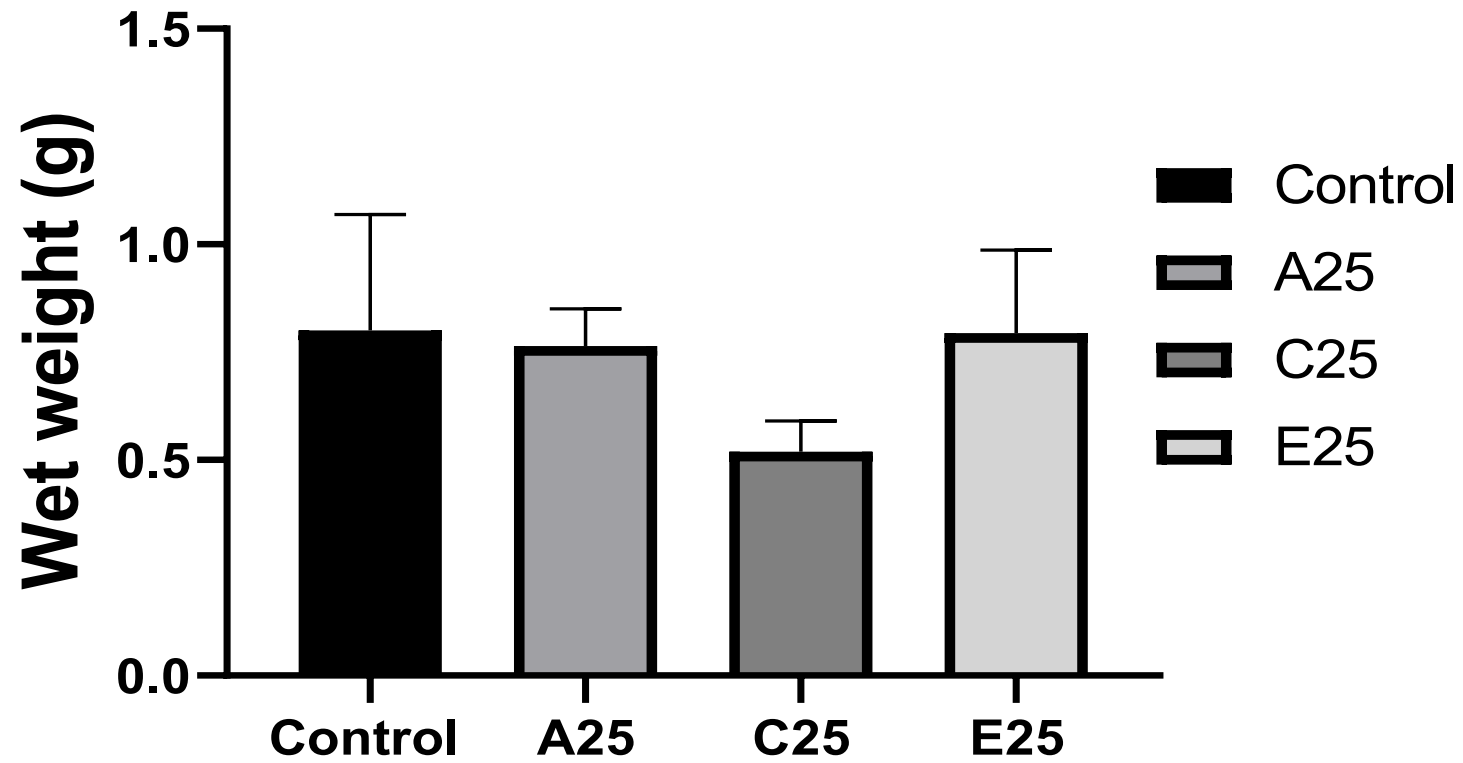

Figure S2. Mycelial wet weight of passaged and control *A. fumigatus* grown in Czapek Dox broth for 72 hours. No significant alteration was observed in the wet weights of the strains.

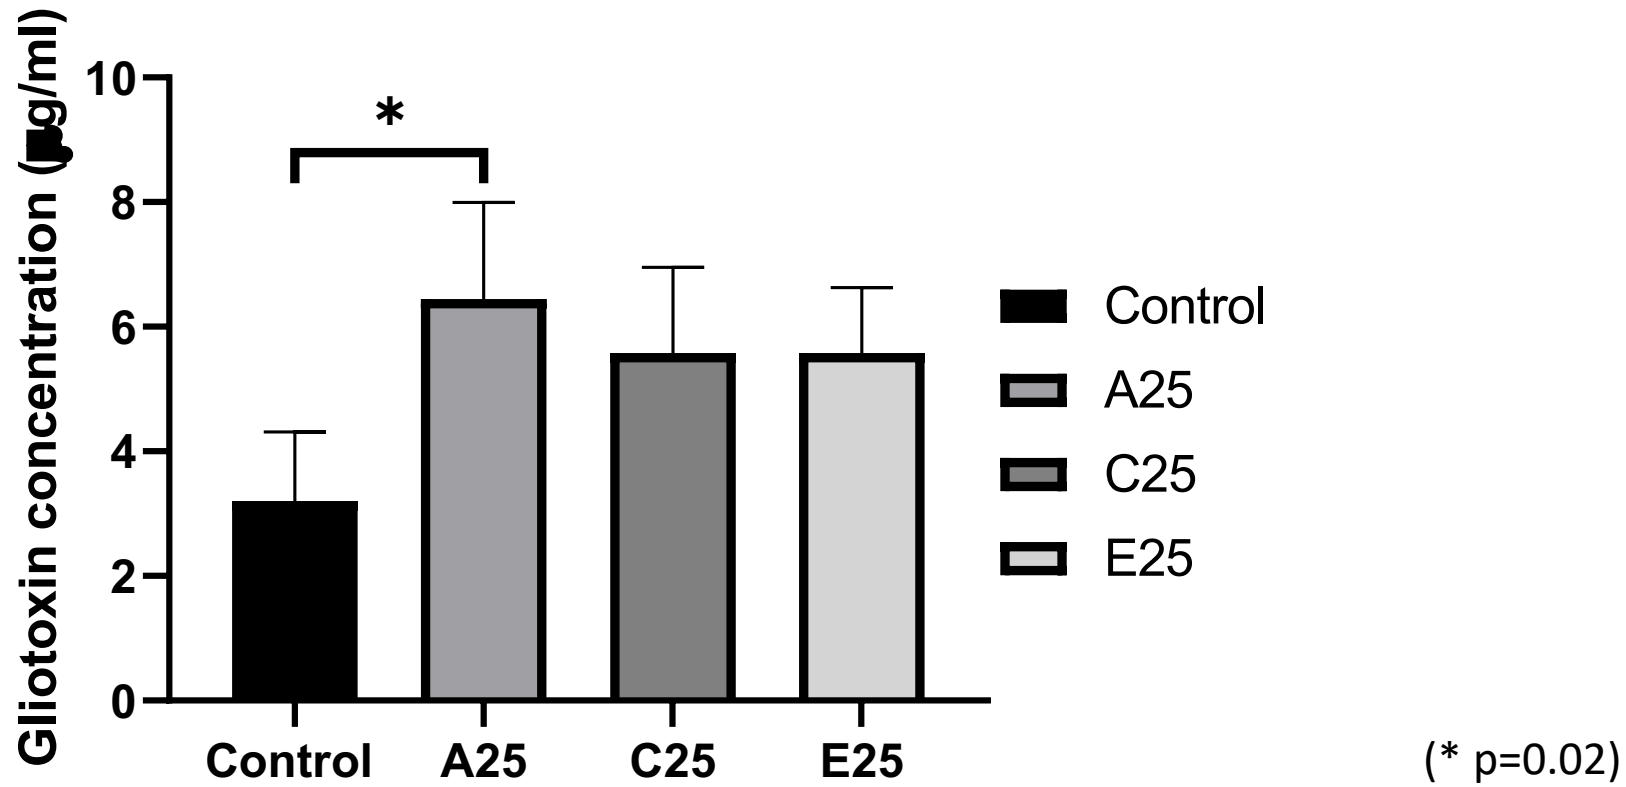

**Figure S3.** The gliotoxin concentration in culture filtrates of passaged and control *A. fumigatus* grown in Czapek Dox broth for 72 hours.

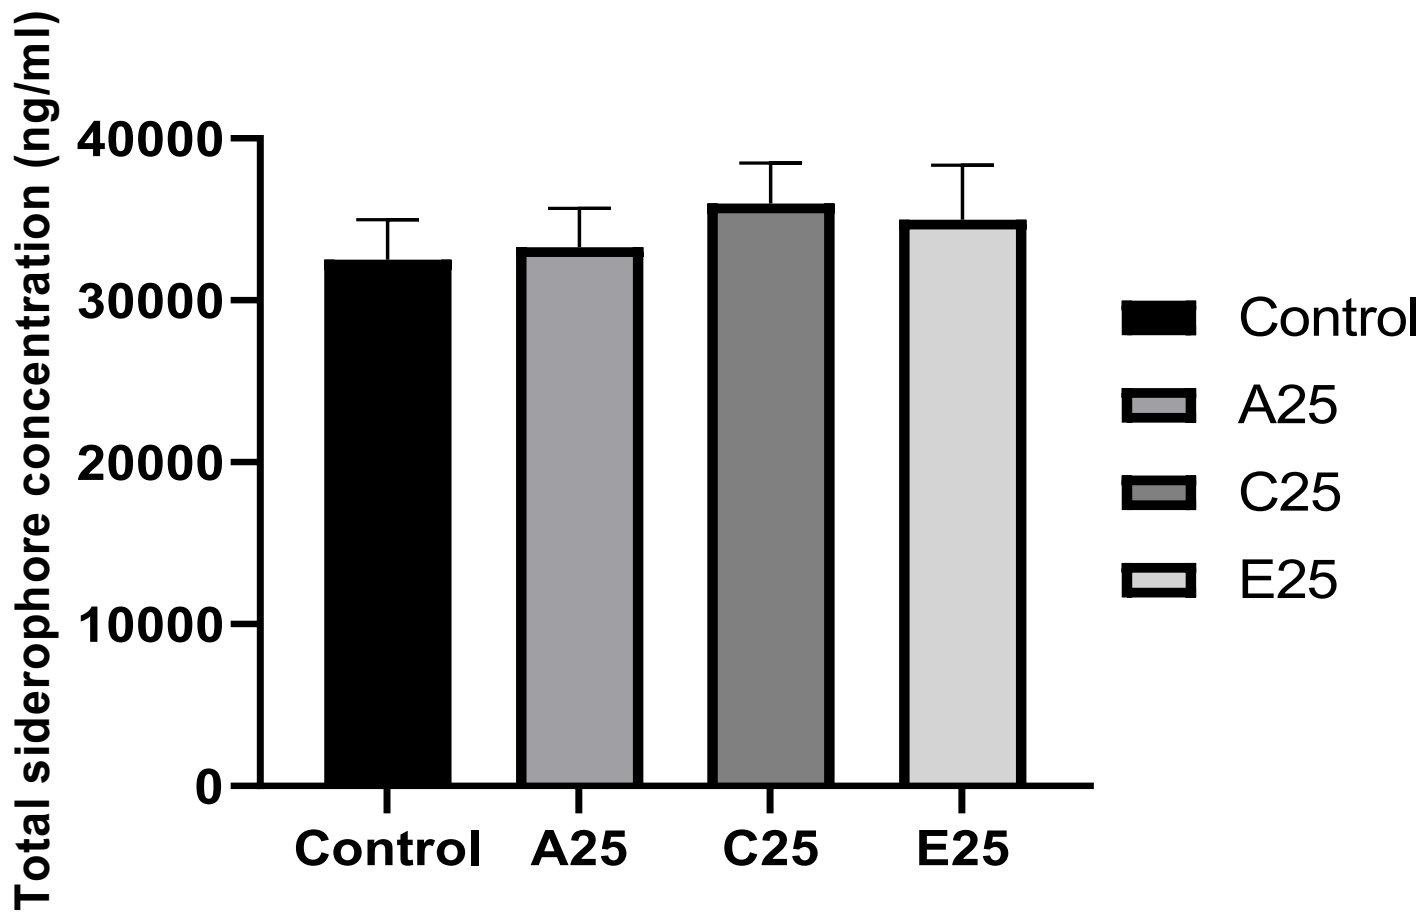

**Figure S4.** The concentration of siderophore in culture filtrate of passaged and control *A. fumigatus* grown in Czapek Dox broth for 72 hours.

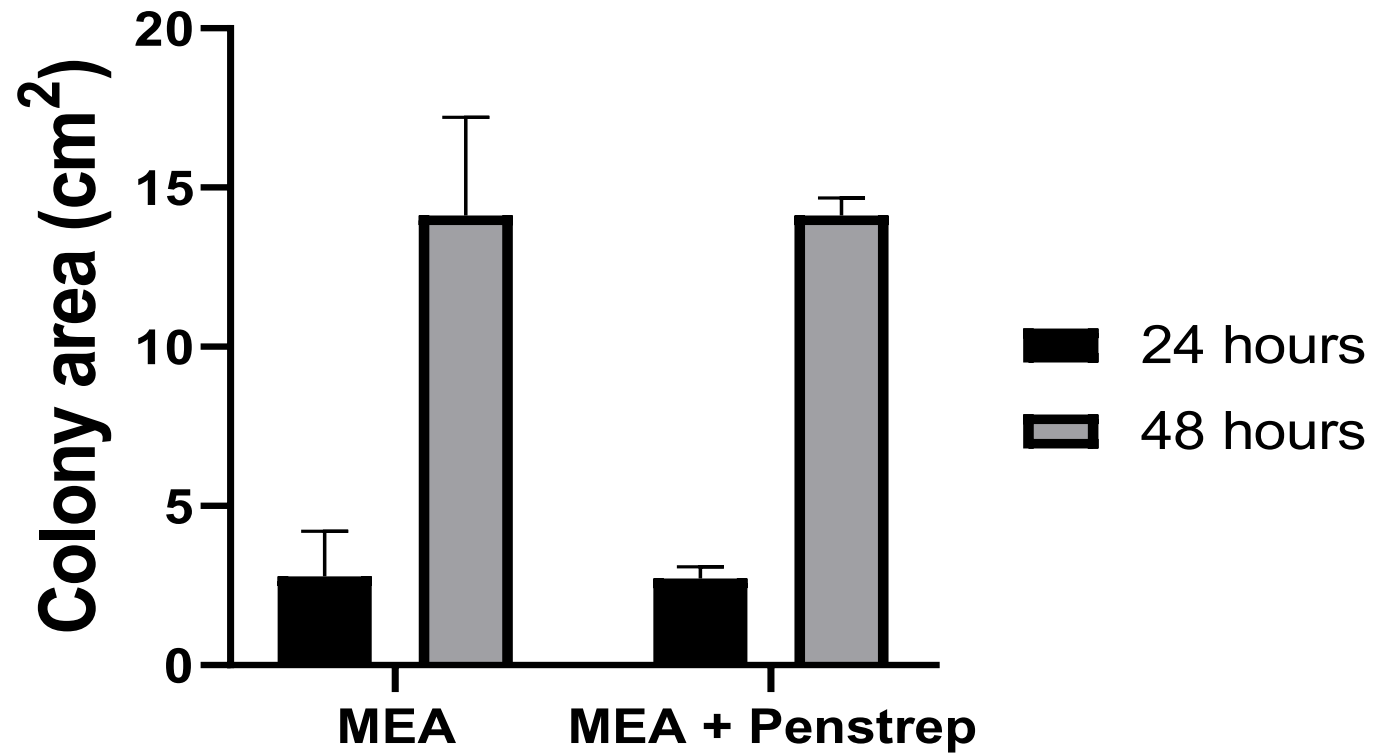

**Figure S5.** Radial growth of control *A. fumigatus* and *A. fumigatus* grown on MEA supplemented with 0.1% (v/v) penstrep, for 48 hours.

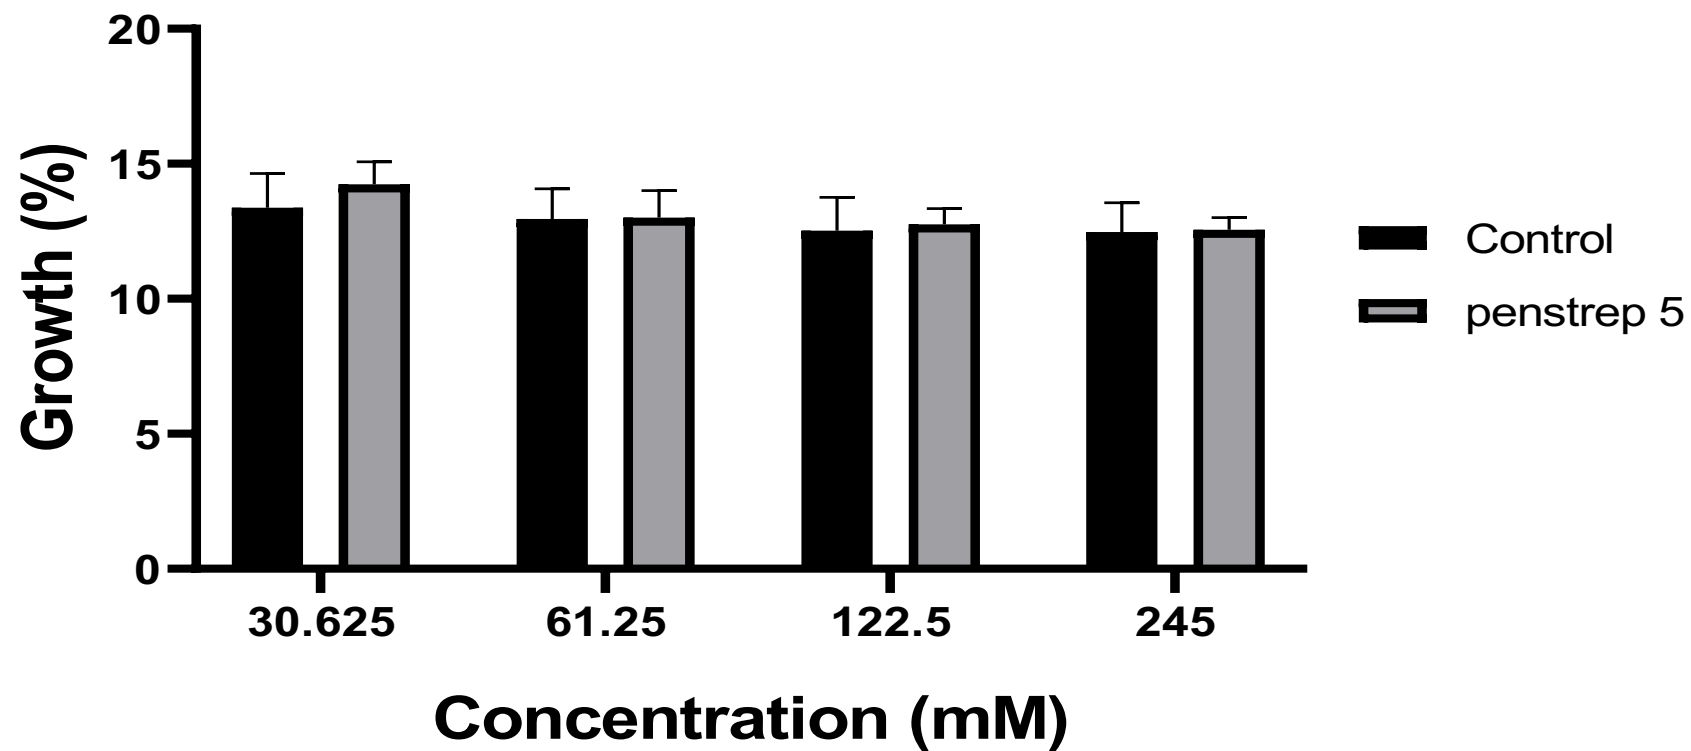

**Figure S6.** Response of control and penstrep-passaged *A. fumigatus* to hydrogen peroxide. *A. fumigatus* grown in the presence of 0.1% (v/v) penstrep for five passages demonstrated no significant alteration in response to hydrogen peroxide.

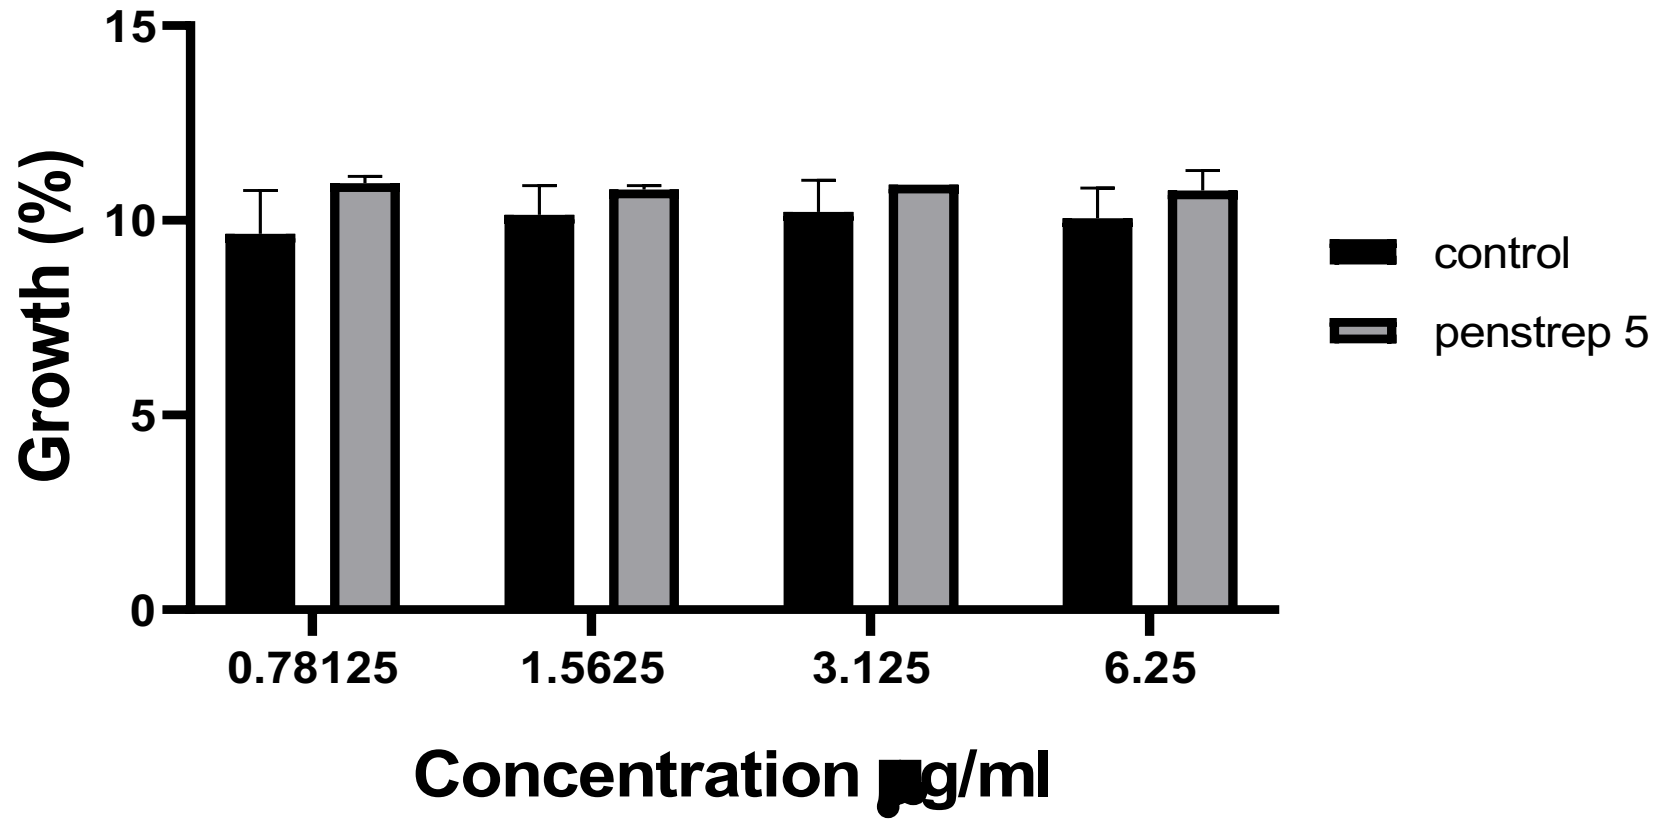

**Figure S7.** Response of control and penstrep-passaged *A. fumigatus* to Amphotericin B. *A. fumigatus* grown in the presence of 0.1% (v/v) penstrep for five passages demonstrated no significant alteration in response to Amphotericin B.

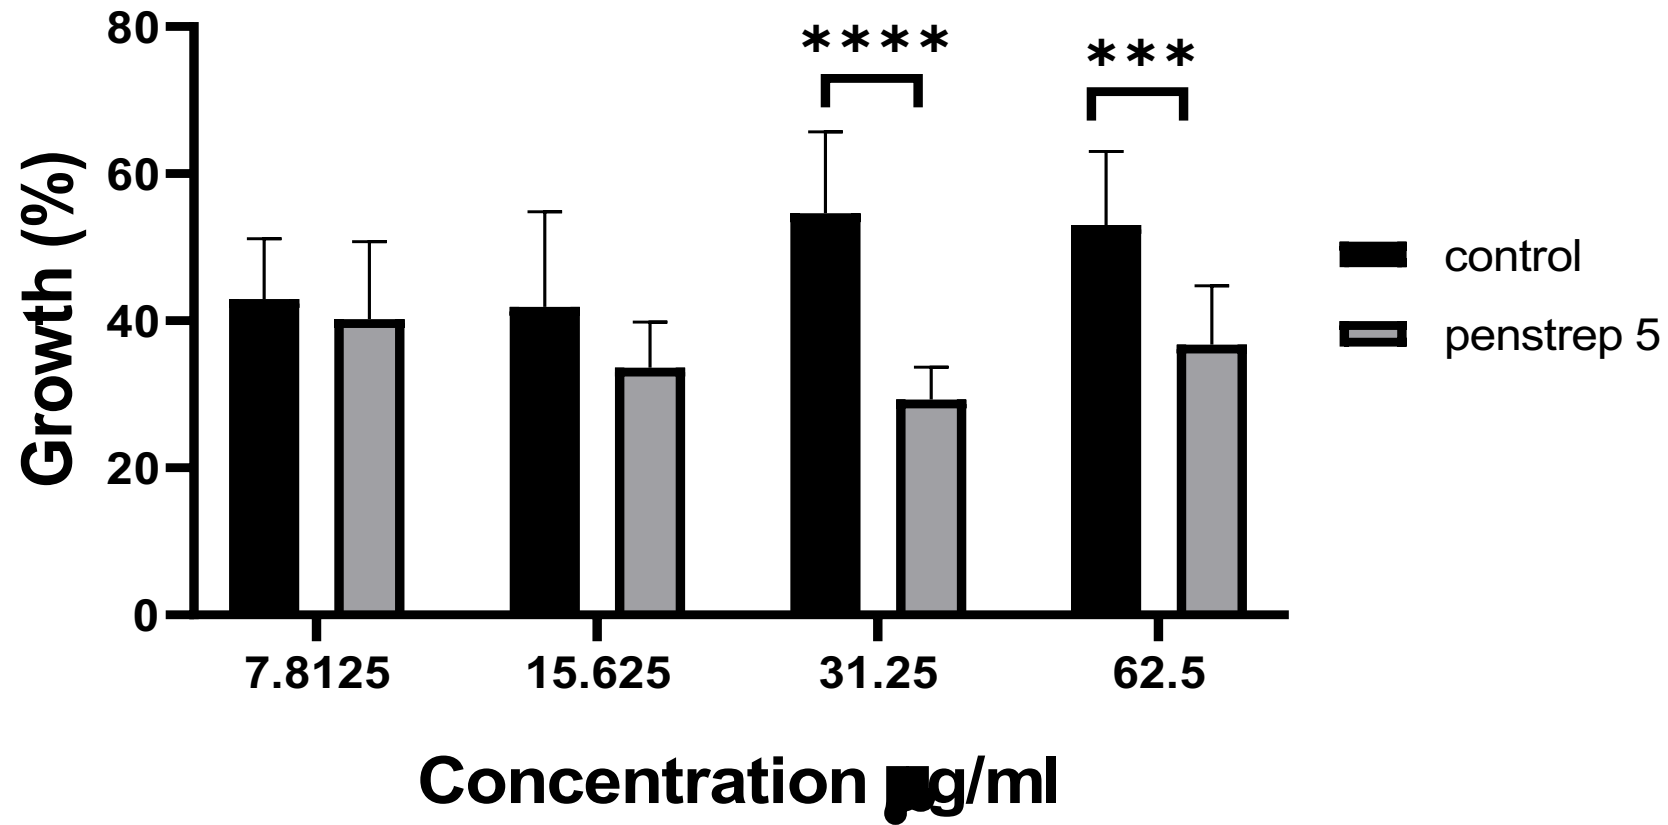

**Figure S8.** Response of control and penstrep-passaged *A. fumigatus* to itraconazole. *A. fumigatus* grown in the presence of 0.1% (v/v) penstrep for five passages demonstrated increased susceptibility to itraconazole at 31.25 and 62.5  $\mu\text{g/ml}$ . (\*\*\*)  $p = 0.001$ , (\*\*\*\*)  $p = 0.0001$ )
